# Supplementary material
Source: Research Square preprint supplement (doi:10.21203/rs.3.rs-8888021/v1)

**Supplementary Table S3.** List of enriched genes and miRNA in respective molecular pathways associated with radioresistance in HNC cells.


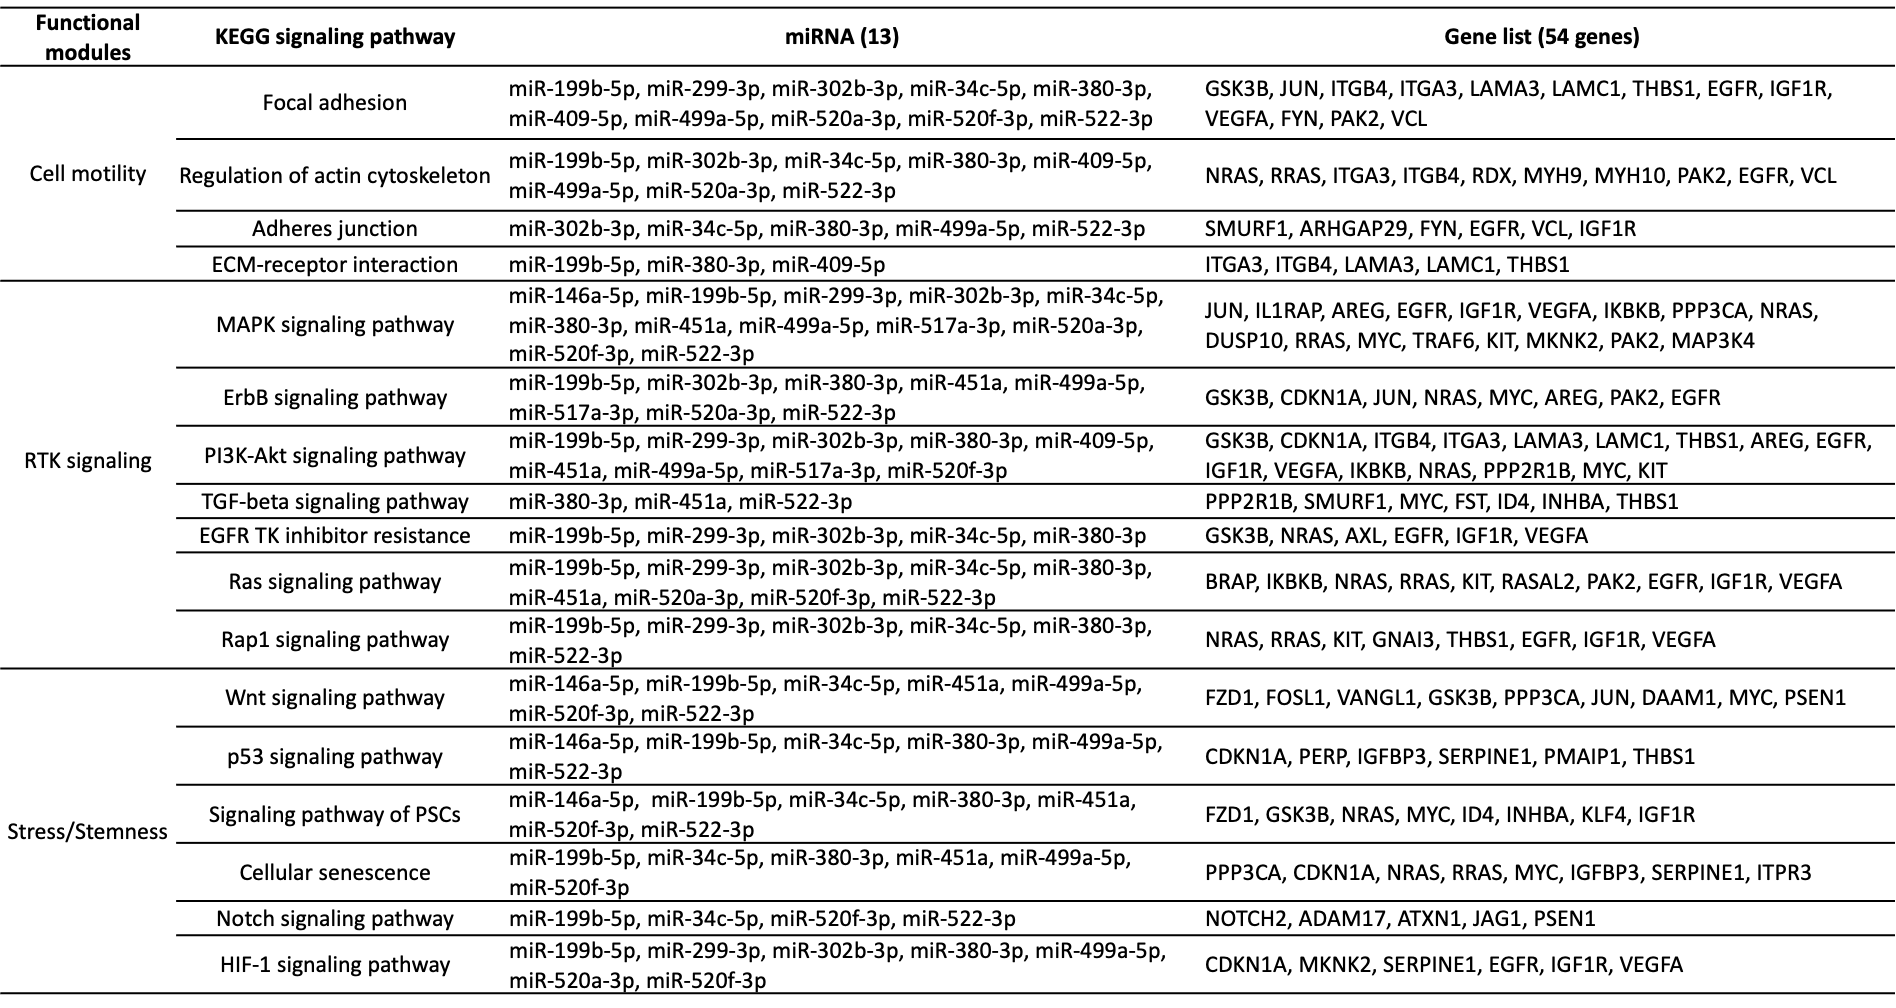

Supplement: Supplementary file 1 [file 060be26d7caf9b7388d26cc3.docx]
