# Supplementary material
Source: Research Square preprint supplement (doi:10.21203/rs.3.rs-8888021/v1)
Supplement: Supplementary file 2 [file 37da0db15456d9a42e0e27f5.docx]

**Supplementary Table S4.** List of antibodies used for Western blot analysis.

| **Antibody** | **Source** | **Cat. NO.** | **Dilution** |
| --- | --- | --- | --- |
| Anti-IGF1R | Abcam | ab182408 | 1:1000 |
| Anti-p-ERK1/2 (Thr202/Tyr204) | Cell Signaling Technology | 4370 | 1:1000 |
| Anti-ERK1/2 | Cell Signaling Technology | 9102 | 1:1000 |
| Anti-p-Akt (Ser473) | Abcam | ab81283 | 1:1000 |
| Anti-Akt | Cell Signaling Technology | 9272 | 1:1000 |
| Anti-GAPDH | ABclonal | AC033 | 1:40000 |
| Anti-mouse IgG, HRP-linked | Cell Signaling Technology | 7076 | 1:5000 |
| Anti-rabbit IgG, HRP-linked | Cell Signaling Technology | 7074 | 1:5000 |

Catalog number (Cat.No.)
