# Supplementary material
Source: Research Square preprint supplement (doi:10.21203/rs.3.rs-8888021/v1)
Supplement: Supplementary file 3 [file 5a2717ff2f7c813378d10a3f.docx]

**Supplementary Table S2.** List of differentially expressed miRNAs associated with the radioresistant phenotype in Detroit cells.

| **miRNA** | **Detroit-Pt** | **Detroit-RR** | **log2(RR/Pt)** | **Expression** |
| --- | --- | --- | --- | --- |
| hsa-miR-654-5p | 0.05 | 2.56 | 5.69 | Up |
| hsa-miR-373-5p | 0.01 | 0.50 | 5.64 | Up |
| hsa-miR-498-5p | 0.05 | 1.36 | 4.74 | Up |
| hsa-miR-614 | 0.01 | 0.22 | 4.48 | Up |
| hsa-miR-617 | 0.01 | 0.21 | 4.40 | Up |
| hsa-miR-512-3p | 0.02 | 0.34 | 4.14 | Up |
| hsa-miR-662 | 0.03 | 0.38 | 3.56 | Up |
| hsa-miR-198 | 0.09 | 0.98 | 3.39 | Up |
| hsa-miR-184 | 0.01 | 0.09 | 3.14 | Up |
| hsa-miR-602 | 0.06 | 0.49 | 3.04 | Up |
| hsa-miR-596 | 0.01 | 0.08 | 2.92 | Up |
| hsa-miR-663a | 0.19 | 1.35 | 2.86 | Up |
| hsa-miR-513a-5p | 2.58 | 17.65 | 2.77 | Up |
| hsa-miR-638 | 2.12 | 14.28 | 2.75 | Up |
| hsa-miR-659-3p | 0.01 | 0.06 | 2.68 | Up |
| hsa-miR-583 | 0.01 | 0.08 | 2.59 | Up |
| hsa-miR-188-5p | 0.99 | 5.91 | 2.57 | Up |
| hsa-miR-622 | 0.10 | 0.54 | 2.48 | Up |
| hsa-miR-422a | 0.01 | 0.05 | 2.34 | Up |
| hsa-miR-564 | 0.10 | 0.41 | 2.01 | Up |
| hsa-miR-630 | 0.35 | 1.14 | 1.70 | Up |
| hsa-miR-129-5p | 0.04 | 0.12 | 1.62 | Up |
| hsa-miR-431-5p | 0.01 | 0.03 | 1.59 | Up |
| hsa-miR-410-3p | 0.01 | 0.03 | 1.58 | Up |
| hsa-miR-191-3p | 0.18 | 0.52 | 1.55 | Up |
| hsa-miR-370-3p | 3.69 | 10.63 | 1.53 | Up |
| hsa-miR-572 | 0.62 | 1.73 | 1.48 | Up |
| hsa-miR-629-3p | 0.21 | 0.57 | 1.46 | Up |
| hsa-miR-214-3p | 0.04 | 0.12 | 1.45 | Up |
| hsa-miR-134-5p | 0.06 | 0.16 | 1.40 | Up |
| hsa-miR-557 | 0.10 | 0.26 | 1.30 | Up |
| hsa-miR-601 | 0.20 | 0.47 | 1.22 | Up |
| hsa-miR-100-5p | 5.16 | 11.90 | 1.21 | Up |
| hsa-miR-125b-5p | 11.10 | 25.11 | 1.18 | Up |
| hsa-miR-206 | 0.20 | 0.46 | 1.17 | Up |
| hsa-miR-492 | 0.03 | 0.06 | 1.15 | Up |
| hsa-miR-658 | 0.06 | 0.12 | 1.08 | Up |
| hsa-miR-301a-3p | 17.15 | 8.54 | -1.01 | Down |
| hsa-miR-193a-3p | 2.47 | 1.23 | -1.01 | Down |
| hsa-miR-330-3p | 0.44 | 0.22 | -1.02 | Down |
| hsa-miR-495-3p | 0.02 | 0.01 | -1.04 | Down |
| hsa-miR-412-3p | 0.02 | 0.01 | -1.06 | Down |
| hsa-miR-625-5p | 4.94 | 2.36 | -1.07 | Down |
| hsa-miR-503-5p | 0.51 | 0.24 | -1.07 | Down |
| hsa-miR-33a-5p | 13.88 | 6.49 | -1.10 | Down |
| hsa-miR-324-5p | 5.88 | 2.74 | -1.10 | Down |
| hsa-miR-218-5p | 0.14 | 0.07 | -1.10 | Down |
| hsa-miR-517c-3p | 0.02 | 0.01 | -1.13 | Down |
| hsa-miR-199b-5p | 0.02 | 0.01 | -1.13 | Down |
| hsa-miR-150-5p | 0.02 | 0.01 | -1.14 | Down |
| hsa-miR-373-3p | 0.16 | 0.07 | -1.14 | Down |
| hsa-miR-219a-5p | 0.25 | 0.11 | -1.14 | Down |
| hsa-miR-342-3p | 3.00 | 1.36 | -1.14 | Down |
| hsa-miR-657 | 0.02 | 0.01 | -1.15 | Down |
| hsa-miR-514a-3p | 0.02 | 0.01 | -1.16 | Down |
| hsa-miR-508-3p | 0.05 | 0.02 | -1.16 | Down |
| hsa-miR-151a-3p | 19.67 | 8.71 | -1.18 | Down |
| hsa-miR-636 | 0.16 | 0.07 | -1.18 | Down |
| hsa-miR-802 | 0.02 | 0.01 | -1.19 | Down |
| hsa-miR-645 | 0.02 | 0.01 | -1.19 | Down |
| hsa-miR-484 | 1.45 | 0.63 | -1.19 | Down |
| hsa-miR-505-3p | 0.14 | 0.06 | -1.21 | Down |
| hsa-miR-510-5p | 0.04 | 0.02 | -1.23 | Down |
| hsa-miR-769-5p | 0.40 | 0.17 | -1.23 | Down |
| hsa-miR-561-3p | 0.02 | 0.01 | -1.24 | Down |
| hsa-miR-518e-3p | 0.02 | 0.01 | -1.26 | Down |
| hsa-miR-766-3p | 1.26 | 0.53 | -1.26 | Down |
| hsa-miR-30d-5p | 18.57 | 7.61 | -1.29 | Down |
| hsa-miR-589-3p | 0.16 | 0.06 | -1.29 | Down |
| hsa-miR-138-5p | 0.34 | 0.14 | -1.29 | Down |
| hsa-miR-367-3p | 0.02 | 0.01 | -1.29 | Down |
| hsa-miR-615-3p | 0.02 | 0.01 | -1.30 | Down |
| hsa-miR-520d-5p | 0.03 | 0.01 | -1.35 | Down |
| hsa-miR-525-5p | 0.03 | 0.01 | -1.35 | Down |
| hsa-miR-25-3p | 33.29 | 12.85 | -1.37 | Down |
| hsa-miR-154-5p | 0.03 | 0.01 | -1.41 | Down |
| hsa-miR-576-5p | 0.03 | 0.01 | -1.42 | Down |
| hsa-miR-519d-3p | 0.03 | 0.01 | -1.42 | Down |
| hsa-miR-126-3p | 0.39 | 0.15 | -1.42 | Down |
| hsa-miR-127-3p | 0.03 | 0.01 | -1.43 | Down |
| hsa-miR-580-3p | 0.03 | 0.01 | -1.43 | Down |
| hsa-miR-340-3p | 0.15 | 0.06 | -1.44 | Down |
| hsa-miR-106b-5p | 50.67 | 18.16 | -1.48 | Down |
| hsa-miR-605-5p | 0.03 | 0.01 | -1.49 | Down |
| hsa-miR-302a-3p | 0.04 | 0.01 | -1.49 | Down |
| hsa-miR-519b-3p | 0.03 | 0.01 | -1.50 | Down |
| hsa-miR-599 | 0.03 | 0.01 | -1.51 | Down |
| hsa-miR-216a-5p | 0.03 | 0.01 | -1.51 | Down |
| hsa-miR-542-5p | 0.50 | 0.18 | -1.51 | Down |
| hsa-miR-527 | 0.03 | 0.01 | -1.53 | Down |
| hsa-miR-520c-3p | 0.04 | 0.01 | -1.54 | Down |
| hsa-miR-378a-3p | 13.60 | 4.61 | -1.56 | Down |
| hsa-miR-92b-3p | 1.22 | 0.41 | -1.58 | Down |
| hsa-miR-559 | 0.03 | 0.01 | -1.59 | Down |
| hsa-miR-133b | 0.03 | 0.01 | -1.60 | Down |
| hsa-miR-520a-3p | 0.03 | 0.01 | -1.61 | Down |
| hsa-miR-199a-5p | 0.07 | 0.02 | -1.62 | Down |
| hsa-miR-34b-5p | 0.58 | 0.19 | -1.62 | Down |
| hsa-miR-122-5p | 0.03 | 0.01 | -1.66 | Down |
| hsa-miR-378a-5p | 0.41 | 0.13 | -1.68 | Down |
| hsa-miR-618 | 0.03 | 0.01 | -1.71 | Down |
| hsa-miR-517b-3p | 0.03 | 0.01 | -1.72 | Down |
| hsa-miR-637 | 0.03 | 0.01 | -1.72 | Down |
| hsa-miR-93-5p | 36.80 | 11.05 | -1.74 | Down |
| hsa-miR-656-3p | 0.03 | 0.01 | -1.75 | Down |
| hsa-miR-548b-3p | 0.03 | 0.01 | -1.79 | Down |
| hsa-miR-483-3p | 0.03 | 0.01 | -1.80 | Down |
| hsa-miR-202-5p | 0.04 | 0.01 | -1.82 | Down |
| hsa-miR-641 | 0.06 | 0.02 | -1.84 | Down |
| hsa-miR-518f-3p | 0.04 | 0.01 | -1.85 | Down |
| hsa-miR-613 | 0.04 | 0.01 | -1.86 | Down |
| hsa-miR-519c-3p | 0.04 | 0.01 | -1.87 | Down |
| hsa-miR-143-3p | 0.04 | 0.01 | -1.92 | Down |
| hsa-miR-302a-5p | 0.04 | 0.01 | -1.96 | Down |
| hsa-miR-346 | 0.04 | 0.01 | -1.98 | Down |
| hsa-miR-520d-3p | 0.16 | 0.04 | -1.99 | Down |
| hsa-miR-595 | 0.38 | 0.10 | -2.00 | Down |
| hsa-miR-525-3p | 0.04 | 0.01 | -2.00 | Down |
| hsa-miR-10a-5p | 0.70 | 0.17 | -2.04 | Down |
| hsa-miR-455-5p | 3.62 | 0.87 | -2.06 | Down |
| hsa-miR-10b-5p | 0.16 | 0.04 | -2.06 | Down |
| hsa-miR-544a | 0.04 | 0.01 | -2.06 | Down |
| hsa-miR-506-3p | 0.04 | 0.01 | -2.06 | Down |
| hsa-miR-520f-3p | 0.04 | 0.01 | -2.07 | Down |
| hsa-miR-223-3p | 0.21 | 0.05 | -2.09 | Down |
| hsa-miR-520g-3p | 0.04 | 0.01 | -2.14 | Down |
| hsa-miR-499a-5p | 0.04 | 0.01 | -2.14 | Down |
| hsa-miR-299-3p | 0.07 | 0.02 | -2.17 | Down |
| hsa-miR-551a | 0.05 | 0.01 | -2.17 | Down |
| hsa-miR-619-3p | 0.05 | 0.01 | -2.18 | Down |
| hsa-miR-302c-5p | 0.05 | 0.01 | -2.18 | Down |
| hsa-miR-522-3p | 0.05 | 0.01 | -2.20 | Down |
| hsa-miR-571 | 0.09 | 0.02 | -2.23 | Down |
| hsa-miR-517a-3p | 0.05 | 0.01 | -2.26 | Down |
| hsa-miR-449a | 0.05 | 0.01 | -2.26 | Down |
| hsa-miR-582-5p | 0.05 | 0.01 | -2.26 | Down |
| hsa-miR-524-3p | 0.05 | 0.01 | -2.26 | Down |
| hsa-miR-302d-3p | 0.05 | 0.01 | -2.29 | Down |
| hsa-miR-661 | 0.05 | 0.01 | -2.41 | Down |
| hsa-miR-204-5p | 0.05 | 0.01 | -2.41 | Down |
| hsa-miR-376a-5p | 0.05 | 0.01 | -2.43 | Down |
| hsa-miR-382-5p | 0.06 | 0.01 | -2.45 | Down |
| hsa-miR-383-5p | 0.10 | 0.02 | -2.48 | Down |
| hsa-miR-519e-3p | 0.06 | 0.01 | -2.53 | Down |
| hsa-miR-323b-5p | 0.18 | 0.03 | -2.57 | Down |
| hsa-miR-449b-5p | 0.06 | 0.01 | -2.58 | Down |
| hsa-miR-451a | 0.07 | 0.01 | -2.60 | Down |
| hsa-miR-130a-3p | 21.06 | 3.25 | -2.70 | Down |
| hsa-miR-302b-3p | 0.07 | 0.01 | -2.72 | Down |
| hsa-miR-579-3p | 0.07 | 0.01 | -2.74 | Down |
| hsa-miR-634 | 0.07 | 0.01 | -2.75 | Down |
| hsa-miR-493-5p | 0.07 | 0.01 | -2.76 | Down |
| hsa-miR-548c-3p | 0.28 | 0.04 | -2.78 | Down |
| hsa-miR-585-3p | 0.07 | 0.01 | -2.80 | Down |
| hsa-miR-211-5p | 0.08 | 0.01 | -2.92 | Down |
| hsa-miR-328-3p | 0.16 | 0.02 | -2.93 | Down |
| hsa-miR-515-3p | 0.18 | 0.02 | -3.03 | Down |
| hsa-miR-372-3p | 0.08 | 0.01 | -3.04 | Down |
| hsa-miR-338-3p | 0.47 | 0.06 | -3.04 | Down |
| hsa-miR-9-3p | 4.07 | 0.39 | -3.37 | Down |
| hsa-miR-380-3p | 0.11 | 0.01 | -3.40 | Down |
| hsa-miR-371a-3p | 0.12 | 0.01 | -3.53 | Down |
| hsa-miR-520h | 0.12 | 0.01 | -3.53 | Down |
| hsa-miR-649 | 0.12 | 0.01 | -3.63 | Down |
| hsa-miR-326 | 0.52 | 0.04 | -3.71 | Down |
| hsa-miR-409-5p | 0.14 | 0.01 | -3.86 | Down |
| hsa-miR-653-5p | 0.16 | 0.01 | -3.97 | Down |
| hsa-miR-34c-5p | 0.28 | 0.01 | -4.80 | Down |
| hsa-miR-124-3p | 0.40 | 0.01 | -5.33 | Down |
| hsa-miR-146a-5p | 6.50 | 0.10 | -6.04 | Down |

RR, radioresistance; Pt, parental
