# Supplementary material
Source: Research Square preprint supplement (doi:10.21203/rs.3.rs-8888021/v1)
Supplement: Supplementary file 4 [file 9738b724a40a2142df521d56.docx]

**Table 1.** Summary of the 42 candidate miRNAs-associated with RR in HNC cells.

|  | **OECM1** | **Detroit** |  |  |
| --- | --- | --- | --- | --- |
| **miRNA** | **Fold (RR/Pt)** | **Fold (RR/Pt)** | **Fold (mean)** | **SD** |
| **Up regulation** |  |  |  |  |
| hsa-miR-513a-5p | 82.600 | 6.835 | 44.718 | 53.574 |
| hsa-miR-654-5p | 22.932 | 51.473 | 37.202 | 20.182 |
| hsa-miR-662 | 7.624 | 11.77 | 9.697 | 2.932 |
| hsa-miR-198 | 3.463 | 10.509 | 6.986 | 4.983 |
| hsa-miR-564 | 5.849 | 4.022 | 4.935 | 1.292 |
| hsa-miR-622 | 4.076 | 5.593 | 4.835 | 1.073 |
| hsa-miR-638 | 2.875 | 6.733 | 4.804 | 2.728 |
| hsa-miR-129-5p | 5.172 | 3.071 | 4.121 | 1.486 |
| hsa-miR-214-3p | 3.338 | 2.723 | 3.031 | 0.435 |
| hsa-miR-572 | 3.06 | 2.784 | 2.922 | 0.195 |
| hsa-miR-630 | 2.431 | 3.257 | 2.844 | 0.584 |
| hsa-miR-370-3p | 2.699 | 2.881 | 2.790 | 0.129 |
| **Down regulation** |  |  |  |  |
| hsa-miR-146a-5p | 0.230 | 0.015 | 0.122 | 0.152 |
| hsa-miR-34c-5p | 0.236 | 0.036 | 0.136 | 0.142 |
| hsa-miR-302b-3p | 0.156 | 0.152 | 0.154 | 0.003 |
| hsa-miR-451a | 0.147 | 0.165 | 0.156 | 0.013 |
| hsa-miR-299-3p | 0.166 | 0.223 | 0.194 | 0.04 |
| hsa-miR-409-5p | 0.326 | 0.069 | 0.197 | 0.182 |
| hsa-miR-380-3p | 0.305 | 0.094 | 0.200 | 0.149 |
| hsa-miR-499a-5p | 0.176 | 0.227 | 0.201 | 0.036 |
| hsa-miR-517a-3p | 0.199 | 0.209 | 0.204 | 0.007 |
| hsa-miR-522-3p | 0.199 | 0.218 | 0.208 | 0.013 |
| hsa-miR-520a-3p | 0.121 | 0.328 | 0.224 | 0.146 |
| hsa-miR-548c-3p | 0.322 | 0.145 | 0.234 | 0.125 |
| hsa-miR-520f-3p | 0.249 | 0.238 | 0.244 | 0.008 |
| hsa-miR-571 | 0.281 | 0.214 | 0.247 | 0.048 |
| hsa-miR-519c-3p | 0.222 | 0.273 | 0.247 | 0.036 |
| hsa-miR-302a-3p | 0.142 | 0.356 | 0.249 | 0.151 |
| hsa-miR-561-3p | 0.121 | 0.424 | 0.272 | 0.214 |
| hsa-miR-649 | 0.468 | 0.081 | 0.274 | 0.274 |
| hsa-miR-382-5p | 0.407 | 0.183 | 0.295 | 0.159 |
| hsa-miR-495-3p | 0.134 | 0.485 | 0.309 | 0.248 |
| hsa-miR-548b-3p | 0.344 | 0.289 | 0.316 | 0.039 |
| hsa-miR-493-5p | 0.491 | 0.148 | 0.319 | 0.242 |
| hsa-miR-34b-5p | 0.359 | 0.324 | 0.342 | 0.025 |
| hsa-miR-520g-3p | 0.498 | 0.227 | 0.363 | 0.191 |
| hsa-miR-122-5p | 0.427 | 0.316 | 0.371 | 0.078 |
| hsa-miR-519b-3p | 0.397 | 0.354 | 0.375 | 0.031 |
| hsa-miR-520c-3p | 0.499 | 0.343 | 0.421 | 0.110 |
| hsa-miR-126-3p | 0.474 | 0.373 | 0.423 | 0.072 |
| hsa-miR-193a-3p | 0.440 | 0.497 | 0.469 | 0.040 |
| hsa-miR-199b-5p | 0.484 | 0.457 | 0.471 | 0.019 |

RR, radioresistance; Pt, parental; SD, standard deviation
