# Supplementary material
Source: Research Square preprint supplement (doi:10.21203/rs.3.rs-8888021/v1)
Supplement: Supplementary file 5 [file ef635269f9e2f991202ef2f9.docx]

**Supplementary Table S1.** List of differentially expressed miRNAs associated with the radioresistant phenotype in OECM1 cells.

| **miRNA** | **OECM1-Pt** | **OECM1-RR** | **log2(RR/Pt)** | **Expression** |
| --- | --- | --- | --- | --- |
| hsa-miR-513a-5p | 0.23 | 19.18 | 6.37 | Up |
| hsa-miR-95-3p | 0.01 | 0.24 | 4.57 | Up |
| hsa-miR-654-5p | 0.01 | 0.23 | 4.52 | Up |
| hsa-miR-770-5p | 0.01 | 0.23 | 4.08 | Up |
| hsa-miR-551b-3p | 0.01 | 0.12 | 3.61 | Up |
| hsa-miR-631 | 0.01 | 0.11 | 3.48 | Up |
| hsa-miR-328-3p | 0.01 | 0.11 | 3.39 | Up |
| hsa-miR-636 | 0.01 | 0.09 | 3.19 | Up |
| hsa-miR-662 | 0.01 | 0.08 | 2.93 | Up |
| hsa-miR-212-3p | 0.11 | 0.72 | 2.75 | Up |
| hsa-miR-564 | 0.02 | 0.12 | 2.55 | Up |
| hsa-miR-30b-5p | 0.62 | 3.42 | 2.47 | Up |
| hsa-miR-610 | 0.01 | 0.05 | 2.43 | Up |
| hsa-miR-519e-5p | 0.01 | 0.05 | 2.41 | Up |
| hsa-miR-129-5p | 0.02 | 0.11 | 2.37 | Up |
| hsa-miR-589-3p | 0.01 | 0.05 | 2.35 | Up |
| hsa-miR-9-5p | 0.26 | 1.29 | 2.31 | Up |
| hsa-miR-30c-5p | 2.04 | 9.10 | 2.16 | Up |
| hsa-miR-622 | 0.03 | 0.14 | 2.03 | Up |
| hsa-miR-508-3p | 0.01 | 0.04 | 1.99 | Up |
| hsa-miR-198 | 0.05 | 0.17 | 1.79 | Up |
| hsa-miR-520h | 0.01 | 0.04 | 1.77 | Up |
| hsa-miR-214-3p | 0.01 | 0.03 | 1.74 | Up |
| hsa-miR-648 | 0.01 | 0.03 | 1.68 | Up |
| hsa-miR-609 | 0.01 | 0.03 | 1.67 | Up |
| hsa-miR-494-3p | 21.47 | 66.40 | 1.63 | Up |
| hsa-miR-653-5p | 0.01 | 0.03 | 1.62 | Up |
| hsa-miR-572 | 0.15 | 0.45 | 1.61 | Up |
| hsa-miR-637 | 0.01 | 0.03 | 1.57 | Up |
| hsa-miR-302a-5p | 0.03 | 0.09 | 1.57 | Up |
| hsa-miR-638 | 1.68 | 4.83 | 1.52 | Up |
| hsa-miR-517b-3p | 0.01 | 0.03 | 1.49 | Up |
| hsa-miR-138-5p | 0.03 | 0.07 | 1.47 | Up |
| hsa-miR-370-3p | 2.26 | 6.10 | 1.43 | Up |
| hsa-miR-520d-3p | 0.04 | 0.11 | 1.42 | Up |
| hsa-miR-634 | 0.01 | 0.03 | 1.42 | Up |
| hsa-miR-202-3p | 1.45 | 3.81 | 1.39 | Up |
| hsa-miR-597-5p | 0.01 | 0.03 | 1.39 | Up |
| hsa-miR-504-5p | 0.01 | 0.03 | 1.37 | Up |
| hsa-miR-509-3p | 0.40 | 1.03 | 1.35 | Up |
| hsa-miR-630 | 0.19 | 0.46 | 1.28 | Up |
| hsa-miR-518c-3p | 0.01 | 0.02 | 1.22 | Up |
| hsa-miR-483-3p | 0.01 | 0.02 | 1.18 | Up |
| hsa-miR-373-3p | 0.05 | 0.11 | 1.18 | Up |
| hsa-miR-605-5p | 0.01 | 0.02 | 1.08 | Up |
| hsa-miR-501-5p | 0.21 | 0.43 | 1.01 | Up |
| hsa-miR-452-5p | 1.54 | 3.10 | 1.01 | Up |
| hsa-miR-9-3p | 0.96 | 1.92 | 1.01 | Up |
| hsa-miR-142-3p | 0.27 | 0.13 | -1.00 | Down |
| hsa-miR-520c-3p | 0.03 | 0.02 | -1.00 | Down |
| hsa-miR-520g-3p | 0.06 | 0.03 | -1.01 | Down |
| hsa-miR-493-5p | 0.03 | 0.01 | -1.03 | Down |
| hsa-miR-199b-5p | 0.04 | 0.02 | -1.05 | Down |
| hsa-miR-345-5p | 1.91 | 0.91 | -1.07 | Down |
| hsa-miR-126-3p | 2.10 | 0.99 | -1.08 | Down |
| hsa-miR-519c-5p | 0.08 | 0.04 | -1.08 | Down |
| hsa-miR-649 | 0.04 | 0.02 | -1.10 | Down |
| hsa-miR-485-5p | 0.03 | 0.01 | -1.10 | Down |
| hsa-miR-136-5p | 0.02 | 0.01 | -1.11 | Down |
| hsa-miR-577 | 0.02 | 0.01 | -1.13 | Down |
| hsa-miR-193a-3p | 0.61 | 0.27 | -1.18 | Down |
| hsa-miR-192-5p | 3.06 | 1.35 | -1.19 | Down |
| hsa-miR-215-5p | 1.80 | 0.79 | -1.19 | Down |
| hsa-miR-190a-5p | 0.22 | 0.09 | -1.21 | Down |
| hsa-miR-147a | 0.02 | 0.01 | -1.22 | Down |
| hsa-miR-520b-3p | 0.02 | 0.01 | -1.22 | Down |
| hsa-miR-122-5p | 0.09 | 0.04 | -1.23 | Down |
| hsa-miR-155-5p | 6.73 | 2.86 | -1.24 | Down |
| hsa-miR-512-3p | 0.05 | 0.02 | -1.26 | Down |
| hsa-miR-18b-5p | 2.84 | 1.18 | -1.27 | Down |
| hsa-miR-382-5p | 0.12 | 0.05 | -1.30 | Down |
| hsa-miR-519b-3p | 0.08 | 0.03 | -1.33 | Down |
| hsa-miR-602 | 0.09 | 0.03 | -1.35 | Down |
| hsa-miR-34b-5p | 1.00 | 0.36 | -1.48 | Down |
| hsa-miR-526b-5p | 0.03 | 0.01 | -1.49 | Down |
| hsa-miR-548b-3p | 0.03 | 0.01 | -1.54 | Down |
| hsa-miR-302c-3p | 0.03 | 0.01 | -1.55 | Down |
| hsa-miR-409-5p | 0.04 | 0.01 | -1.62 | Down |
| hsa-miR-548c-3p | 0.59 | 0.19 | -1.63 | Down |
| hsa-miR-380-3p | 0.03 | 0.01 | -1.71 | Down |
| hsa-miR-562 | 0.03 | 0.01 | -1.80 | Down |
| hsa-miR-571 | 0.05 | 0.01 | -1.83 | Down |
| hsa-miR-137-3p | 0.04 | 0.01 | -1.89 | Down |
| hsa-miR-566 | 0.04 | 0.01 | -1.89 | Down |
| hsa-miR-520f-3p | 0.04 | 0.01 | -2.00 | Down |
| hsa-miR-586 | 0.04 | 0.01 | -2.02 | Down |
| hsa-miR-34c-5p | 0.71 | 0.17 | -2.08 | Down |
| hsa-miR-146a-5p | 0.09 | 0.02 | -2.12 | Down |
| hsa-miR-519c-3p | 0.05 | 0.01 | -2.17 | Down |
| hsa-miR-329-3p | 0.05 | 0.01 | -2.20 | Down |
| hsa-miR-583 | 0.05 | 0.01 | -2.25 | Down |
| hsa-miR-573 | 0.05 | 0.01 | -2.26 | Down |
| hsa-miR-522-3p | 0.05 | 0.01 | -2.33 | Down |
| hsa-miR-517a-3p | 0.05 | 0.01 | -2.33 | Down |
| hsa-miR-1-3p | 0.05 | 0.01 | -2.36 | Down |
| hsa-miR-369-5p | 0.05 | 0.01 | -2.36 | Down |
| hsa-miR-187-3p | 0.06 | 0.01 | -2.41 | Down |
| hsa-miR-563 | 0.06 | 0.01 | -2.46 | Down |
| hsa-miR-539-5p | 0.08 | 0.01 | -2.48 | Down |
| hsa-miR-499a-5p | 0.06 | 0.01 | -2.51 | Down |
| hsa-miR-299-3p | 0.07 | 0.01 | -2.59 | Down |
| hsa-miR-302b-3p | 0.06 | 0.01 | -2.68 | Down |
| hsa-miR-548a-3p | 0.07 | 0.01 | -2.74 | Down |
| hsa-miR-451a | 0.07 | 0.01 | -2.76 | Down |
| hsa-miR-302a-3p | 0.10 | 0.01 | -2.81 | Down |
| hsa-miR-139-5p | 0.20 | 0.03 | -2.88 | Down |
| hsa-miR-520e-3p | 0.07 | 0.01 | -2.89 | Down |
| hsa-miR-495-3p | 0.07 | 0.01 | -2.90 | Down |
| hsa-miR-409-3p | 0.15 | 0.02 | -2.92 | Down |
| hsa-miR-299-5p | 0.08 | 0.01 | -2.97 | Down |
| hsa-miR-561-3p | 0.08 | 0.01 | -3.04 | Down |
| hsa-miR-520a-3p | 0.08 | 0.01 | -3.05 | Down |
| hsa-miR-558 | 0.09 | 0.01 | -3.19 | Down |
| hsa-miR-379-5p | 0.29 | 0.03 | -3.36 | Down |
| hsa-miR-369-3p | 0.11 | 0.01 | -3.52 | Down |
| hsa-miR-553 | 0.12 | 0.01 | -3.53 | Down |
| hsa-miR-381-3p | 0.12 | 0.01 | -3.57 | Down |
| hsa-miR-410-3p | 0.21 | 0.01 | -4.40 | Down |
| hsa-miR-154-3p | 0.23 | 0.01 | -4.53 | Down |
| hsa-miR-758-3p | 0.24 | 0.01 | -4.56 | Down |
| hsa-miR-376a-3p | 0.89 | 0.04 | -4.68 | Down |
| hsa-miR-376c-3p | 0.27 | 0.01 | -4.76 | Down |
| hsa-miR-377-3p | 0.56 | 0.02 | -4.85 | Down |
| hsa-miR-376b-3p | 0.38 | 0.01 | -5.24 | Down |

RR, radioresistance; Pt, parental
